# Supplementary material for: A Comparative Analysis of Gene Expression Profiles during Skin Regeneration in Mus and Acomys
Source: PubMed Central journal article supplement (PMC4659537; doi:10.1371/journal.pone.0142931), 2015-11-25
Supplement: pone.0142931.s001.pdf [file pone.0142931.s001.pdf]

A

## Mus musculus transforming growth factor, beta 1 (Tgfb1), mRNA

Sequence ID: [ref|NM\\_011577.1](#) Length: 2094 Number of Matches: 1Range 1: 1506 to 1568 [GenBank](#) [Graphics](#) ▼ Next Match ▲ Previous Match

| Score        | Expect                                                         | Identities | Gaps     | Strand    |
|--------------|----------------------------------------------------------------|------------|----------|-----------|
| 111 bits(60) | 4e-23                                                          | 62/63(98%) | 0/63(0%) | Plus/Plus |
| Query 1      | AATACAGGGCTTTCGATTTCAGTGCCTCACTGCTCTTGTGACAGCAAAGATAACAAACTCCA | 60         |          |           |
| Sbjct 1506   | AATACAGGGCTTTCGATTTCAGCGCTCACTGCTCTTGTGACAGCAAAGATAACAAACTCCA  | 1565       |          |           |
| Query 61     | CGT 63                                                         |            |          |           |
| Sbjct 1566   | CGT 1568                                                       |            |          |           |

B

## Mus musculus tissue inhibitor of metalloproteinase 1 (Timp1), transcript variant 3, mRNA

Sequence ID: [ref|NM\\_001294280.2](#) Length: 825 Number of Matches: 1Range 1: 613 to 695 [GenBank](#) [Graphics](#) ▼ Next Match ▲ Previous Match

| Score        | Expect                                                        | Identities  | Gaps     | Strand    |
|--------------|---------------------------------------------------------------|-------------|----------|-----------|
| 154 bits(83) | 1e-35                                                         | 83/83(100%) | 0/83(0%) | Plus/Plus |
| Query 1      | CTCGTGGGCTCTGAGGACTACCAGAGCCGTCACCTTTGCTTGCCTGCCACGGAATCCAGGC | 60          |          |           |
| Sbjct 613    | CTCGTGGGCTCTGAGGACTACCAGAGCCGTCACCTTTGCTTGCCTGCCACGGAATCCAGGC | 672         |          |           |
| Query 61     | TTGTGCACCTGGAGATCCCTTGG 83                                    |             |          |           |
| Sbjct 673    | TTGTGCACCTGGAGATCCCTTGG 695                                   |             |          |           |

C

PREDICTED: **Mus musculus** matrix metalloproteinase 9 (Mmp9), transcript variant X1, mRNASequence ID: [ref|XM\\_006498861.2](#) Length: 3220 Number of Matches: 1Range 1: 2163 to 2266 [GenBank](#) [Graphics](#) ▼ Next Match ▲ Previous Match

| Score         | Expect                                                        | Identities  | Gaps        | Strand    |
|---------------|---------------------------------------------------------------|-------------|-------------|-----------|
| 77.0 bits(84) | 3e-11                                                         | 77/104(74%) | 21/104(20%) | Plus/Plus |
| Query 1       | GGCAAATTCCTTCTGGCGTGTGAATTTCCA-----AGG-----GGAGGTG            | 39          |             |           |
| Sbjct 2163    | GGCAAATTCCTTCTGGCGTGTGAGTTTCCAAAATGAGGTGAACAAGGTGGACCATGAGGTG | 2222        |             |           |
| Query 40      | AACCAGGTGGACCACGTCGGGTATGTGACCTACGACCTCCTGCA 83               |             |             |           |
| Sbjct 2223    | AACCAGGTGGACGACGTGGGCTACGTGACCTACGACCTCCTGCA 2266             |             |             |           |
